# Supplementary material
Source: publisher figshare collection journal article supplement (https://acs.figshare.com/ndownloader/files/24790520)
Supplement: Supplementary file 1 [file 24790520]

## Supporting Information

### **Protein Sequence Selection Method That Enables Full Consensus Design of Artificial L-Threonine 3-Dehydrogenases With Unique Enzymatic Properties**

Tomoharu Motoyama<sup>a, 1</sup>, Nozomi Hiramatsu<sup>a, 1</sup>, Yasuhisa Asano<sup>b</sup>, Shogo Nakano<sup>a, \*</sup> and Sohei Ito<sup>a</sup>

a. Graduate School of Integrated Pharmaceutical and Nutritional Sciences, University of Shizuoka, 52-1 Yada, Suruga-ku, Shizuoka 422-8526, Japan

b. Biotechnology Research Center and Department of Biotechnology, Toyama Prefectural University, 5180 Kurokawa, Imizu, Toyama 939-0398, Japan

1: These authors contributed equally to this work

\*Correspondence to Shogo Nakano ([snakano@u-shizuoka-ken.ac.jp](mailto:snakano@u-shizuoka-ken.ac.jp))

## Contents

|                                                                                                                           |                |
|---------------------------------------------------------------------------------------------------------------------------|----------------|
| • <b>Supporting Figures</b>                                                                                               | <b>S3-S6</b>   |
| Sequence logos of TDH libraries                                                                                           | S3, S5         |
| Structural location of the assigned key residues                                                                          | S4             |
| Multiple sequence alignment of five designed L-threonine 3-dehydrogenases (TDHs) by full consensus protein design method. | S6             |
| Details how to calculate $E_{aa, i}$ and $E_c$ value from the result of MSA                                               | S7             |
| Structure comparison between CnTDH and FcTDH-IIYM                                                                         | S8             |
| Location of mutation sites on homology models of each of the designed TDHs                                                | S9             |
| Phylogenetic analysis of the designed TDHs and their homologous sequences                                                 | S10            |
| • <b>Table contents</b>                                                                                                   | <b>S11-S15</b> |
| Protein sequences of five designed TDHs                                                                                   | S11            |
| Sequence identity between the designed TDHs                                                                               | S12            |
| Relative activity of the designed TDHs toward 20 L-amino acids                                                            | S13            |
| Taxonomy analysis of the curated libraries                                                                                | S14            |
| • <b>References</b>                                                                                                       | <b>S15</b>     |

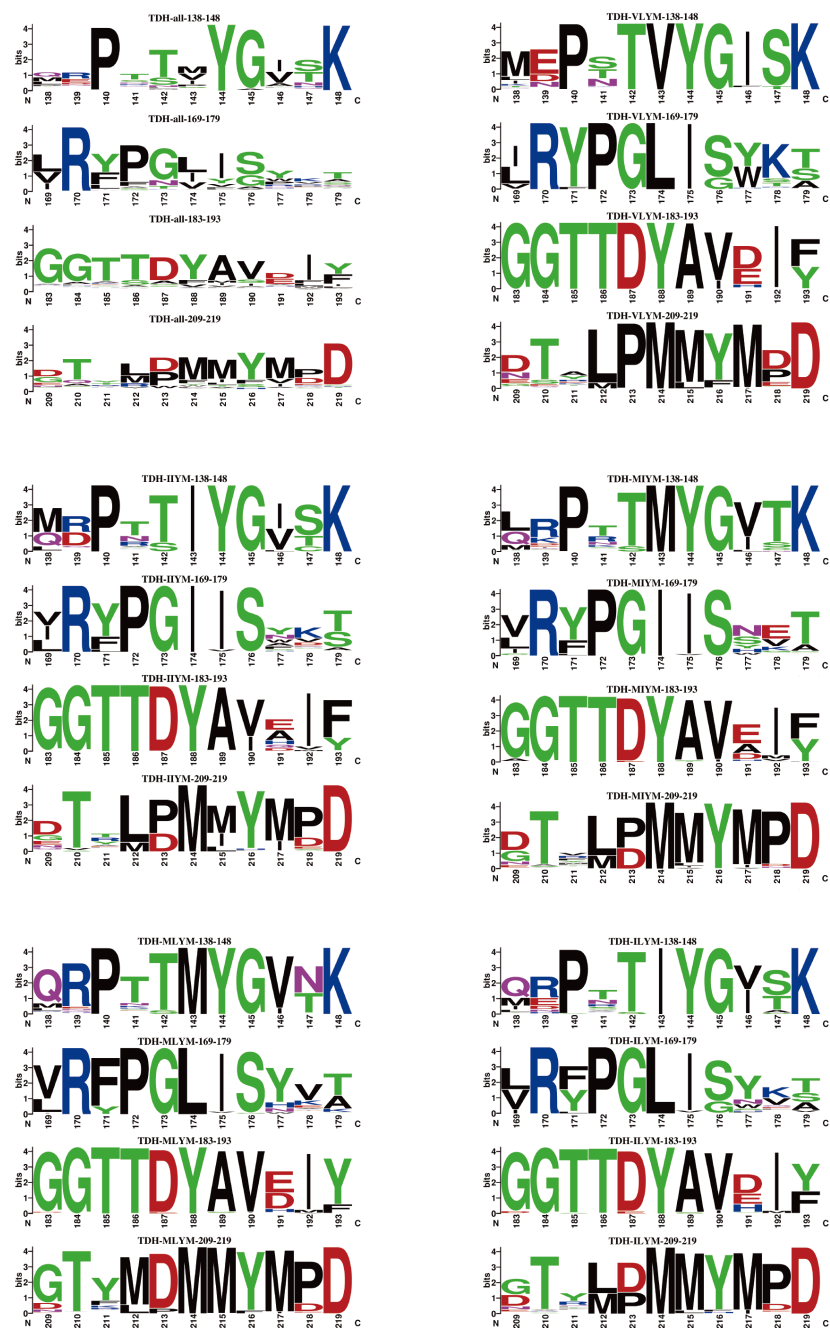

**Figure S1. Sequence logo of non-curated (upper left), VLYM (upper right), ILYM (middle left), MIYM (middle right), MLYM (down left) and ILYM (down right) libraries of TDHs. Sequence logo was generated utilizing WebLogo tools (1).**

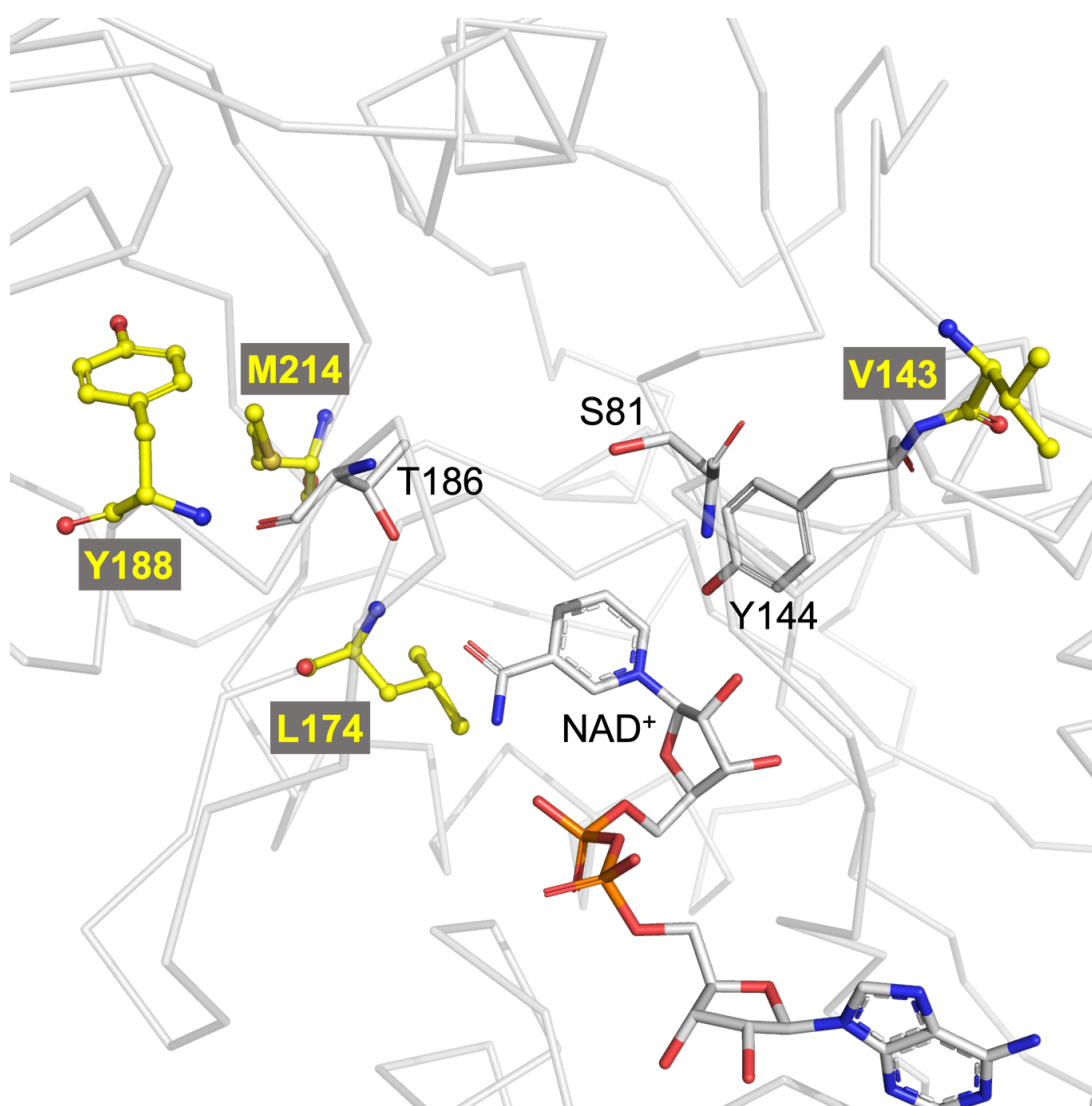

**Figure S2. Structural position of active site residues and key residues on CnTDH structure.** The active site residues (S81, Y144 and T186) and key residues (V143, L174, Y188, M214) were colored by gray and yellow, respectively.



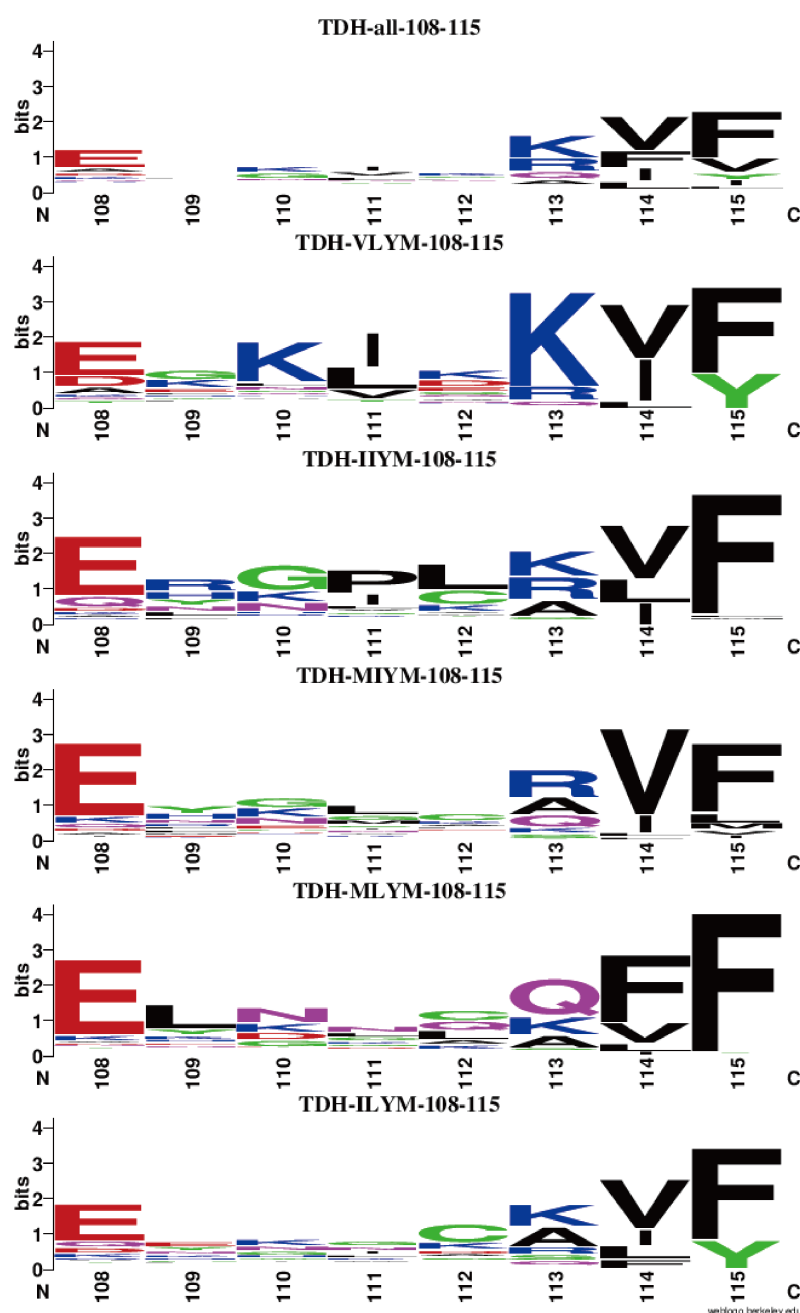

**Figure S3. Sequence logo at 108-115 region of non-curated (1<sup>st</sup> row), VLYM (2<sup>nd</sup> row), IIYM (3<sup>rd</sup> row), MIYM (4<sup>th</sup> row), MLYM (5<sup>th</sup> row) and ILYM (6<sup>th</sup> row) libraries of TDHs. Sequence logo was generated utilizing WebLogo tools (1).**

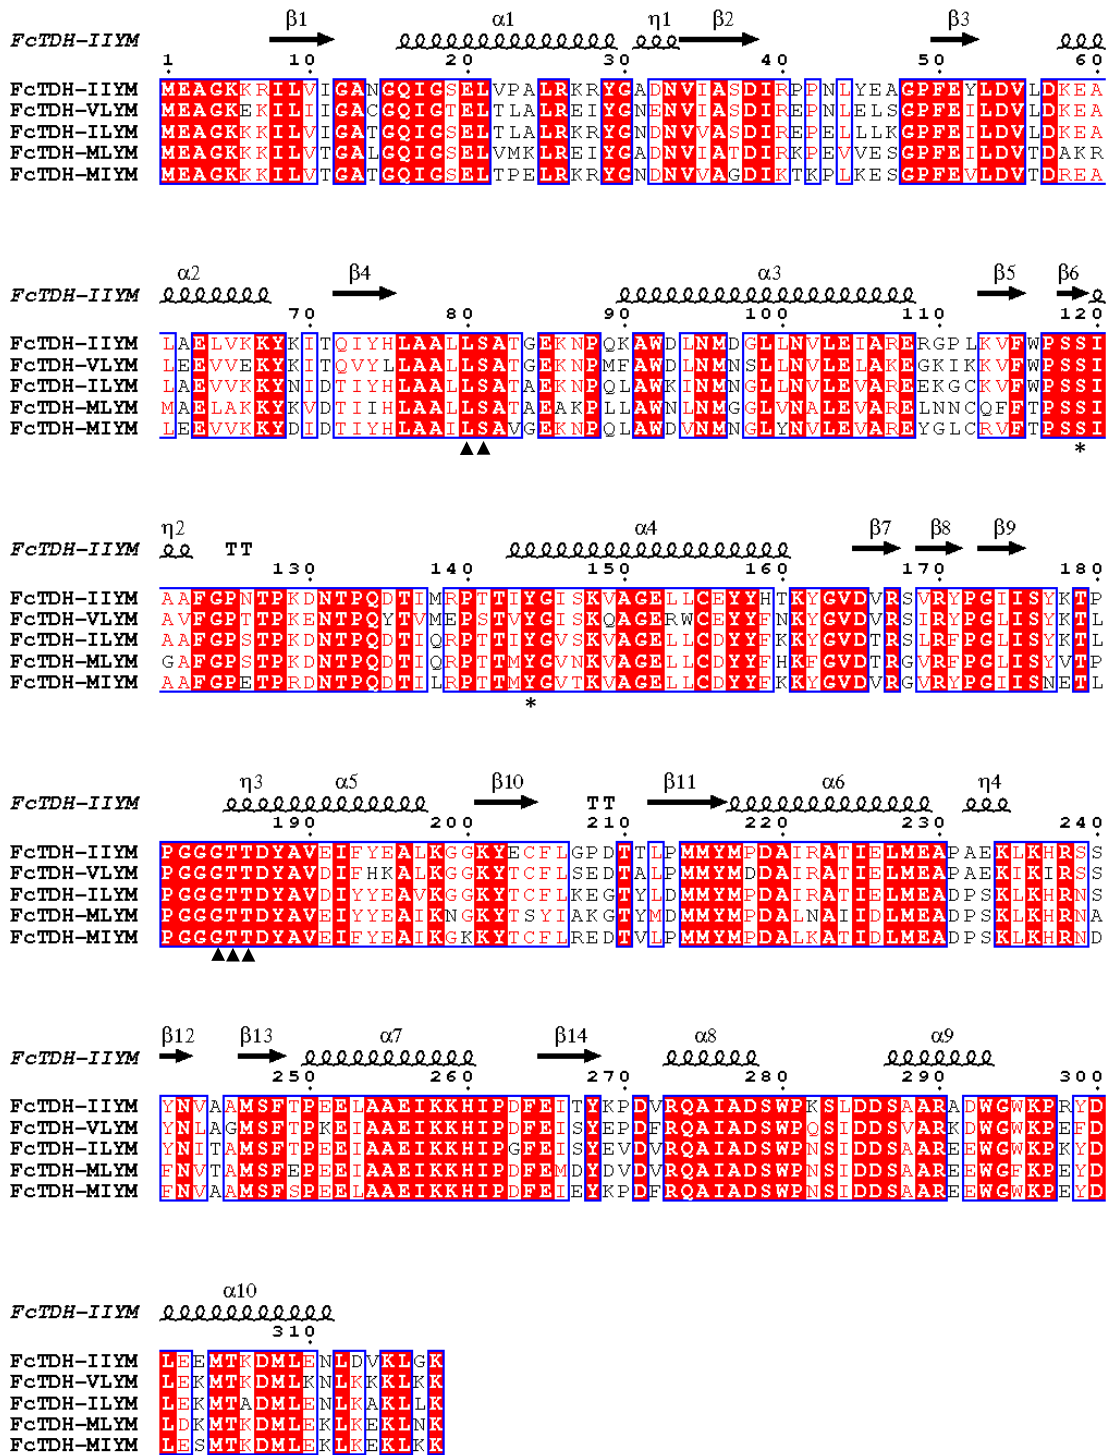

**Figure S4. Multiple sequence alignment of five designed L-threonine 3-dehydrogenases (TDHs) by full consensus protein design method.** The sequences of the designed TDHs were listed in Table S1. Catalytic residues are indicated by \*. Alignment was performed using CLUSTALW, and the figure was generated by ESPrpt.

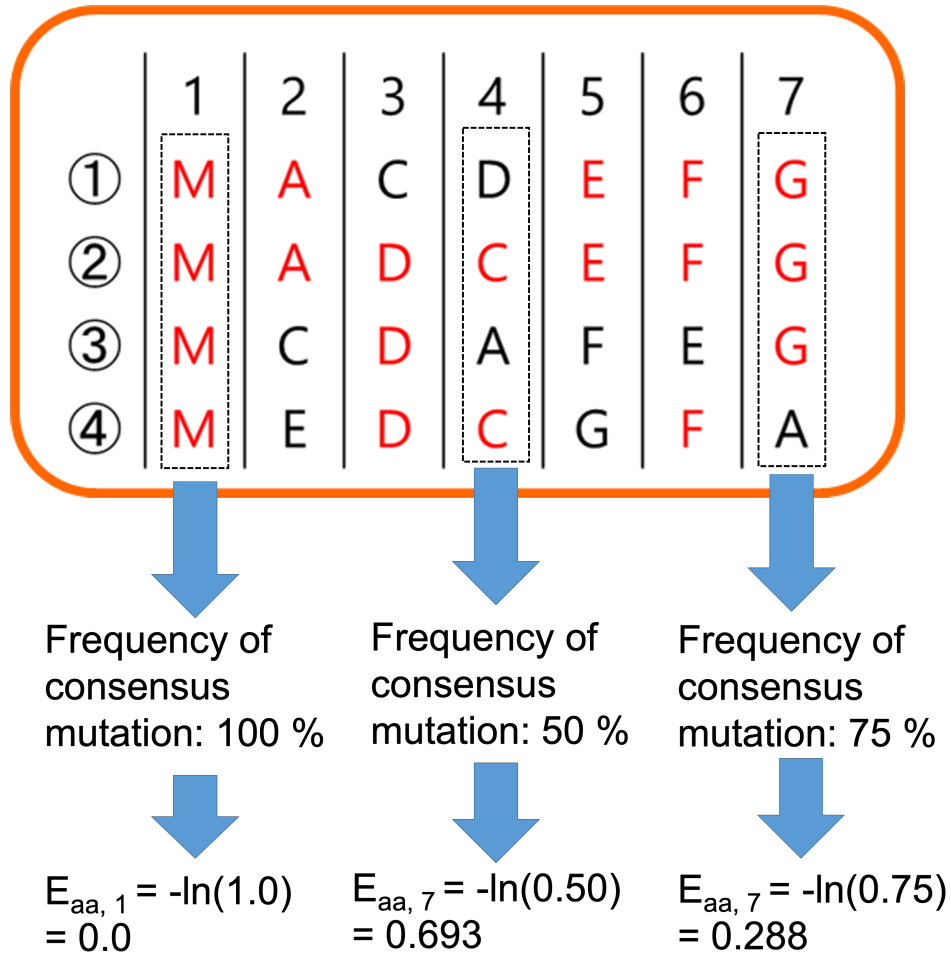

$$E_c = E_{aa,1} + E_{aa,2} + \dots + E_{aa,7} = 1 \cdot 0.0 + 3 \cdot 0.693 + 3 \cdot 0.288 = 2.94$$

**Figure S5. Details how to calculate  $E_{aa,i}$  and  $E_c$  value from the result of multiple sequence alignment.** The  $E_{aa,i}$  values were calculated for each residues (from 1 to 7th residues in this figure). The  $E_c$  value could be calculated by summing all  $E_{aa}$  residues (from  $E_{aa,1}$  to  $E_{aa,7}$  in this figure). The  $E_{aa,i}$  and  $E_c$  value is near zero if the mutation was assigned accurately.

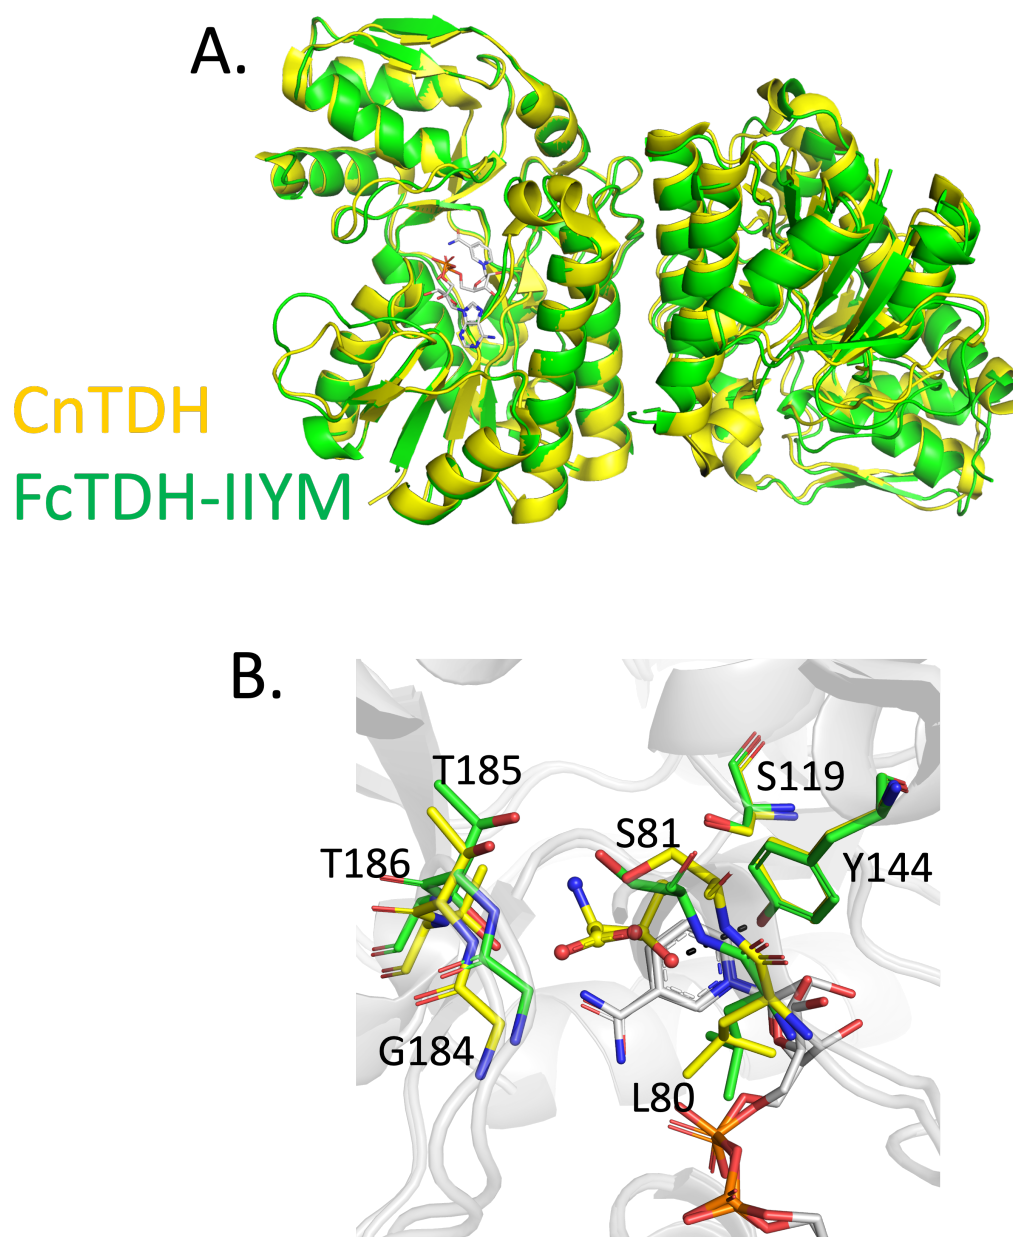

**Figure S6. Structural comparison between CnTDH (PDB ID: 3WMX, yellow) and FcTDH-IIYM (green).** Both overall structure (A) and active site structure (B) are highly conserved in each other. The root mean square deviation value for C $\alpha$  atoms of these two structures was 0.49 Å.

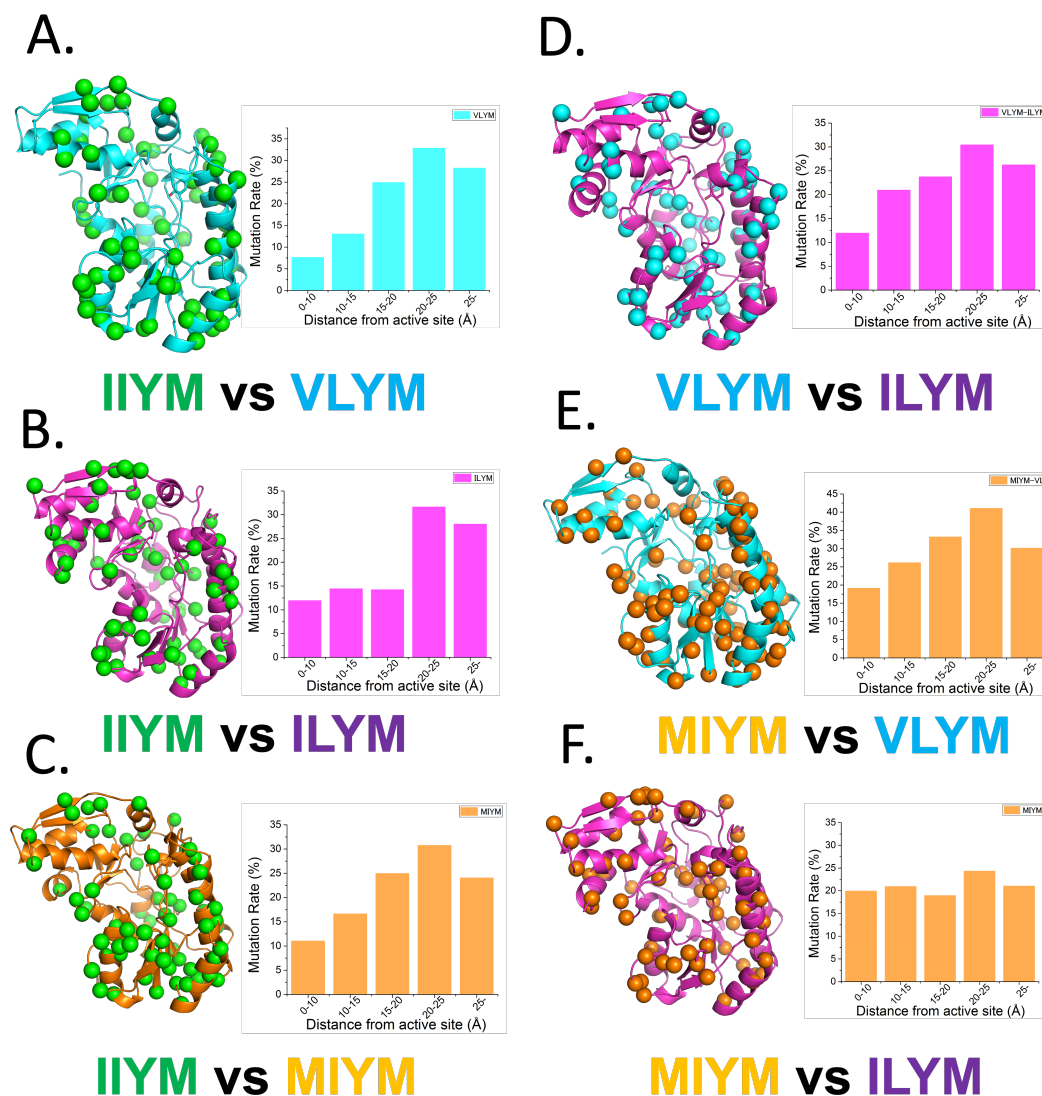

**Figure S7. Location of mutation sites on homology models of each of the designed TDHs (A-F).** The mutation sites which were confirmed by comparing sequence between FcTDH-IIYM (green sphere) and other three FcTDHs (FcTDH-VLYM, FcTDH-ILYM and FcTDH-MIYM) were shown in Fig. S4A, S4B and S4C, respectively, utilizing the same color indicated in Fig.4. The comparison of mutation sites with other combinations was shown in Fig. S4D (FcTDH-VLYM and FcTDH-ILYM), S4E (FcTDH-MIYM and FcTDH-VLYM) and S4F (FcTDH-MIYM and FcTDH-ILYM), respectively.

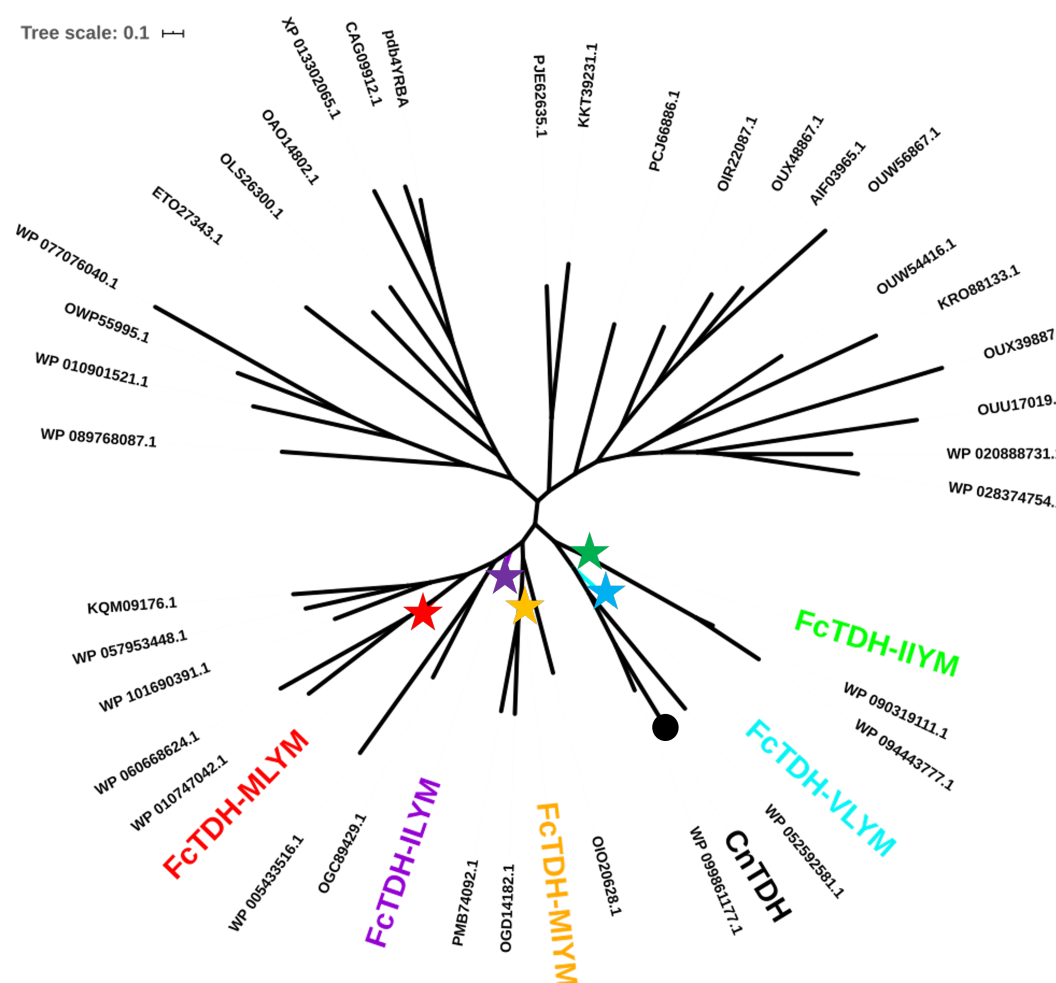

**Figure S8. Phylogenetic analysis of the five designed TDHs and their homologous sequences.** The phylogenetic tree was built by MEGA utilizing maximum likelihood method. Sequences in five of the curated libraries sharing >50% identity with other sequence were omitted by the Python script. The selected sequences are summarized in one data and used to build the tree.

**Table S1. Protein sequences of five designed L-threonine 3-dehydrogenase (TDHs): FcTDH-VLYM, FcTDH-ILYM, FcTDH-IIYM, FcTDH-MIYM and FcTDH-MLYM.**

>FcTDH-VLYM

MEAGKEKILIIGACGQIGTELTLALREIYGNENVIASDIREPNLELSGPFEILDVLDKEALEEVVEKY  
KITQVYLLAALLSATGEKNPMFAWDLNMNSLLNVLELAKEGKIKKVFWPSSIAVFGPTTPKENTP  
QYTVMEPSTVYGISKQAGERWCEYYFNKYGVDVRSIRYPGLISYKTLPGGGTTDYAVDIFHKAL  
KGGKYTCFLSED TALPMMYMDDAIRATIELMEAPAEKIKIRSSYNLAGMSFTPKEIAAEIKKHIPD  
FEISYEPDFRQAIADSWPQSIDDSVARKDWGWKPEFDLEKMTKDMLKNLKKKLLK

>FcTDH-ILYM

MEAGKKKILVIGATGQIGSELTLALRKRYGNDNVVASDIREPELLLKGPFEILDVLDKEALAEVVK  
KYNIDTIYHLAALLSATAEKNPQLAWKINMNGLLNVLEVAREEKGCKVFWPSSIAAFGPSTPKDN  
TPQDTIQRPTTIYGVSKVAGELLCDYYFKKYGVDTRSLRFPGLISYKTLPGGGTTDYAVDIYYEA  
VKGKGYTCFLKEGTYLDMMYMPDAIRATIELMEADPSKLKHRNSYNITAMSFTPEEIAAEIKKHIP  
GFEISYEVDVRQAIADSWPNSIDDSAAREEWGWKPKYDLEKMTADMLENLKAKLLK

>FcTDH-IIYM

MEAGKKRILVIGANGQIGSELPALRKRYGADNVIASDIRPPNLYEAGPFEYLDVLDKEALAEVVK  
KYKITQIYHLAALLSATGEKNPQKAWDLNMDGLLNVLIEARERGPLKVFWPSSIAAFGPNTPKDN  
TPQDTIMRPTTIYGISKVAGELLCEYYHTKYGVDVRSVRYPGIISYKTPPGGGTTDYAVEIFYEAL  
KGGKYECFLGPDITLPMMYMPDAIRATIELMEAPAEKLKHRSSYNVAAMSFTPEELAAEIKKHIP  
DFEITYKPDVRQAIADSWPKSLDDSAARADWGWKPRYDLEEMTKDMLENLVDKLGK

>FcTDH-MIYM

MEAGKKKILVTGATGQIGSELTPELRKRYGNDNVVAGDIKTPLKESGPFEVLDVTDREALEEVV  
KKYDIDTIYHLAALLSAVGEKNPQLAWDVNMNGLYNVLEVAREYGLCRVFTPSIAAFGPETPRD  
NTPQDTILRPTTMYGVTKVAGELLCDYYFKKYGVDVRGVRYPGIISNETLPGGGTTDYAVEIFYE  
AIKGGKYTCFLREDTVLPMMYMPDALKATIDLMEADPSKLKHRNDFNVAAMSFSPHEELAAEIKK  
HIPDFEIEYKPDVRQAIADSWPNSIDDSAAREEWGWKPEYDLESMTKDMLEKLKEKLK

>FcTDH-MLYM

MEAGKKKILVTGALGQIGSELVMKLREIYGADNVIATDIRKPEVVESGPFEILDVTDKRMALAK  
KYKVDTIIHLAALLSATAEAKPLLAWNLMGGLVNALEVARELNNCQFFTPSSIGAFGPSTPKDN  
TPQDTIQRPTTMYGVNKKVAGELLCDYYFHKFGVDTRGVRFPGGLISYVTPPGGGTTDYAVEIYYE  
AIKNGKYTSYIAKGTYMDMMYMPDALNAIIDLMEADPSKLKHRNAFNVNTAMSFEEPEEIAAEIKKH  
PDFEMDYDVRQAIADSWPNSIDDSAAREEWGFKPEYDLKMTKDMLEKLKEKLNK

**Table S2, Sequence identity between the designed TDHs**

| Sequence<br>identity (%) | FcTDH-VLYM | FcTDH-ILYM | FcTDH-IIYM | FcTDH-MIYM | FcTDH-MLYM |
|--------------------------|------------|------------|------------|------------|------------|
| FcTDH-VLYM               | 100        | 75         | 76         | 69         | 61         |
| FcTDH-ILYM               | 75         | 100        | 79         | 79         | 76         |
| FcTDH-IIYM               | 76         | 79         | 100        | 76         | 69         |
| FcTDH-MIYM               | 69         | 79         | 76         | 100        | 74         |
| FcTDH-MLYM               | 61         | 76         | 69         | 74         | 100        |



**Table S3. Specific activity of designed TDHs toward the 20 L-amino acids and other compounds.<sup>a</sup>**

| Substrate           | Relative activity (%) |            |            |            |            |
|---------------------|-----------------------|------------|------------|------------|------------|
|                     | CnTDH(2)              | FcTDH-VLYM | FcTDH-ILYM | FcTDH-IIYM | FcTDH-MIYM |
| L-Thr               | 100                   | 100        | 100        | 100        | 100        |
| DL-Thr              | 64                    | 38.7       | 15.3       | 106        | 19.8       |
| D-Thr               | 0                     | 0          | 0          | 0          | 0          |
| ( <i>R</i> )-3-HB   | n.m.                  | 3.2        | 0          | 20.9       | 1.0        |
| ( <i>rac</i> )-3-HB | n.m.                  | 0          | 0          | 7.8        | 0          |
| ( <i>S</i> )-3-HB   | n.m.                  | 0          | 0          | 0          | 0          |
| L-Ser               | 0                     | 0          | 0          | 0          | 0          |
| <i>L-Amino acid</i> |                       |            |            |            |            |
| L-Ala               | 0                     | 0          | 0          | 0          | 0          |
| L-Cys               | 0                     | 0          | 0          | 0          | 0          |
| L-Asp               | 0                     | 0          | 0          | 0          | 0          |
| L-Glu               | 0                     | 0          | 0          | 0          | 0          |
| L-Phe               | 0                     | 0          | 0          | 0          | 0          |
| Gly                 | 0                     | 0          | 0          | 0          | 0          |
| L-His               | 0                     | 0          | 0          | 0          | 0          |
| L-Ile               | 0                     | 0          | 0          | 0          | 0          |
| L-Lys               | 0                     | 0          | 0          | 0          | 0          |
| L-Leu               | 0                     | 0          | 0          | 0          | 0          |
| L-Met               | 0                     | 0          | 0          | 0          | 0          |
| L-Asn               | 0                     | 0          | 0          | 0          | 0          |
| L-Pro               | 0                     | 0          | 0          | 0          | 0          |
| L-Gln               | 0                     | 0          | 0          | 0          | 0          |
| L-Arg               | 0                     | 0          | 0          | 0          | 0          |
| L-Val               | 0                     | 0          | 0          | 0          | 0          |
| L-Trp               | 0                     | 0          | 0          | 0          | 0          |
| L-Tyr               | 0                     | 0          | 0          | 0          | 0          |

<sup>a</sup> There is no activity toward 20 of D-amino acids.

**Table S4. Taxonomy in the curated libraries to design the four full consensus TDHs.**

|   | FcTDH-VLYM (403seqs)                             | FcTDH-ILYM (115seqs)                  | FcTDH-IIYM (103seqs)                  | FcTDH-MIYM (129seqs)                |
|---|--------------------------------------------------|---------------------------------------|---------------------------------------|-------------------------------------|
| 1 | <i>Flavobacterium</i> : 8.9% (1.9%) <sup>b</sup> | <i>Prevotella</i> : 13.9% (1.4%)      | <i>Massilia</i> : 14.7% (0.8%)        | <i>Candidatus</i> : 18.6% (7.3%)    |
| 2 | <i>Mucilaginibacter</i> : 5.0% (1.1%)            | <i>Chitinophaga</i> : 7.0% (0.8%)     | <i>Candidatus</i> : 14.7% (7.3%)      | <i>Bacteroidetes</i> : 16.3% (3.1%) |
| 3 | <i>Pedobacter</i> : 4.5% (1.2%)                  | <i>Flavobacteriales</i> : 6.1% (0.9%) | <i>Sphingobacterium</i> : 9.8% (0.5%) | <i>Bacteroides</i> : 9.3% (1.8%)    |
| 4 | <i>Flavobacteriaceae</i> : 3.7%                  | <i>Candidatus</i> : 5.2%              | <i>Alistipes</i> : 4.9%               | <i>Thermoplasmatales</i> : 4.7%     |
| 5 | <i>Cryseobacterium</i> : 3.5%                    | <i>Bacteroides</i> : 4.3%             | <i>Prevotella</i> : 4.9%              | <i>Ignavibacteria</i> : 3.9%        |
| 6 | <i>Cupriavidus</i> <sup>a</sup> : 3.0%           | <i>Flexibacter</i> : 2.6%             | <i>Janthinobacterium</i> : 2.9%       | <i>Marinilabiliales</i> : 3.1%      |
| 7 | <i>Algoriphagus</i> : 3.0%                       | <i>Dethiosulfovibrio</i> : 2.6%       | <i>Noviherbaspirillum</i> : 2.9%      | <i>Janthinobacterium</i> : 2.3%     |
| 8 | <i>Hymenobacter</i> : 3.0%                       | Others: 58.3%                         | Others: 45.2%                         | Others: 41.8%                       |
| 9 | <i>Sphingobacteriales</i> : 1.7%                 |                                       |                                       |                                     |
|   | Others: 63.7%                                    |                                       |                                       |                                     |

<sup>a</sup>Genus of *Cupriavidus* includes *Ralstonia*.

<sup>b</sup>Rate of genes which are expressed in the corresponding genus in the non-curated library was calculated for top 3 of the genus in the curated libraries.

## References

1. Crooks, G. E., Hon, G., Chandonia, J. M., and Brenner, S. E. (2004) WebLogo: a sequence logo generator, *Genome Res* 14, 1188-1190.
2. Ueatrongchit, T., and Asano, Y. (2011) Highly selective L-threonine 3-dehydrogenase from *Cupriavidus necator* and its use in determination of L-threonine, *Anal. Biochem.* 410, 44-56.
